# Supplementary figures and images for: Risk of artery dissection during systemic exposure to vascular endothelial growth factor pathway inhibitors
Source: PubMed Central journal article supplement — Clin Transl Sci. 2024 Dec 1;17(12):e70096. doi: 10.1111/cts.70096 (PMC11609114; doi:10.1111/cts.70096), 2024-12-01

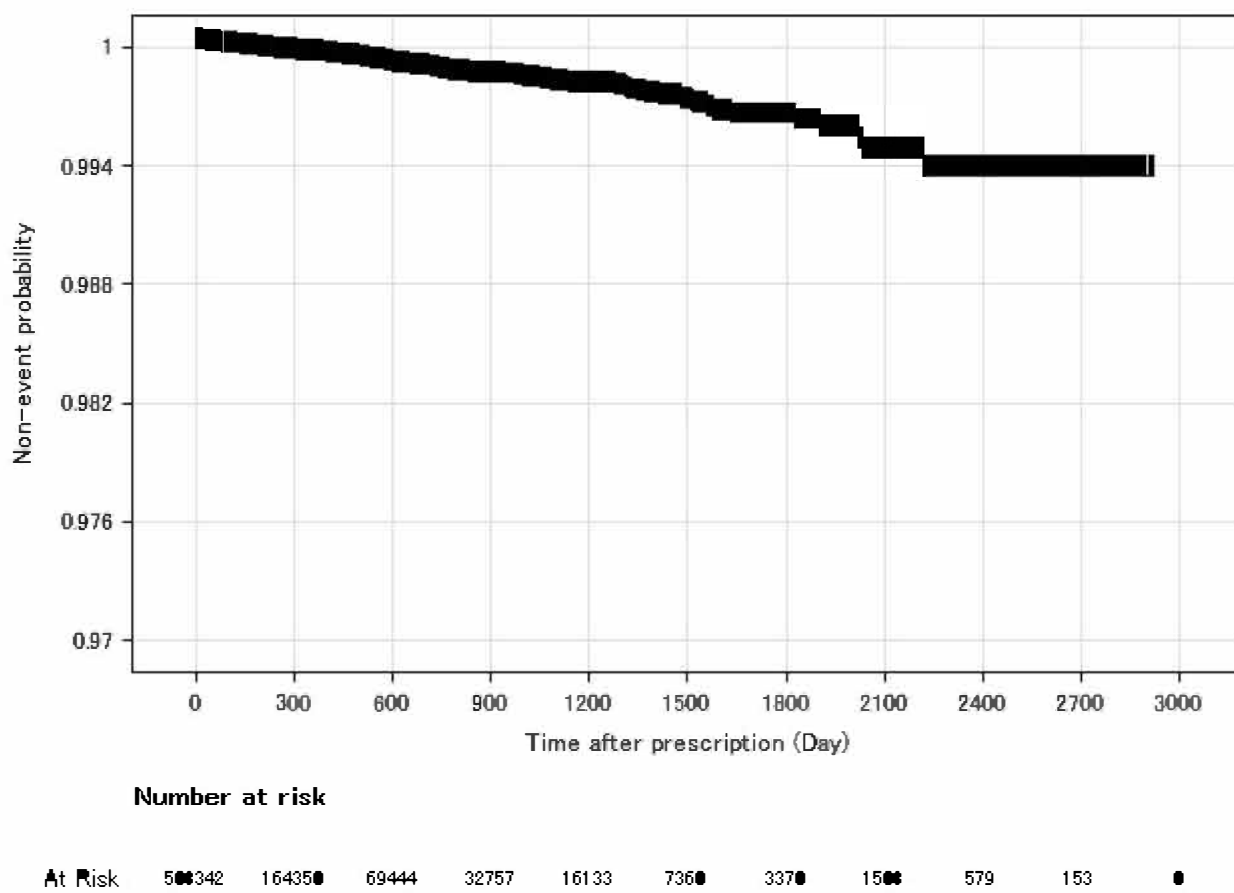

Figure S2. Kaplan-Meier curve for all eligible patients in the primary analysis.

Supplement: CTS-17-e70096-s002.pdf [file CTS-17-e70096-s002.pdf]
